# Supplementary material for: Brown rice and retrograded brown rice alleviate inflammatory response in dextran sulfate sodium (DSS)-induced colitis mice
Source: Royal Society of Chemistry journal article supplement (doi:10.1039/c7fo00305f), 2017-01-01
Supplement: c7fo00305f1.pdf [file c7fo00305f1.pdf]

**Supplement table1.** Proximate analysis of WR, BR and R-BR expressed as g/100g (Mean  $\pm$  SD; n=3)

|                            | WR              | BR              | R-BR            |
|----------------------------|-----------------|-----------------|-----------------|
| Moisture                   | 10.9 $\pm$ 0.36 | 10.2 $\pm$ 0.04 | 10.6 $\pm$ 0.30 |
| Protein                    | 7.5 $\pm$ 0.02  | 8.6 $\pm$ 0.04  | 8.5 $\pm$ 0.00  |
| Fat                        | 0.6 $\pm$ 0.05  | 4.5 $\pm$ 0.09  | 4.4 $\pm$ 0.16  |
| Ash                        | 0.4 $\pm$ 0.00  | 1.5 $\pm$ 0.04  | 1.5 $\pm$ 0.01  |
| Carbohydrate <sup>1</sup>  | 80.2 $\pm$ 0.2  | 71.7 $\pm$ 0.2  | 71.9 $\pm$ 0.2  |
| Dietary fiber <sup>2</sup> | 0.6 $\pm$ 0.06  | 3.3 $\pm$ 0.18  | 3.2 $\pm$ 0.09  |

<sup>1</sup>Carbohydrate data were calculated by the formula 100-protein- fat-dietary fiber-ash

<sup>2</sup>These data were obtained by the method of AOAC.

**Supplement table2.** Criteria for scoring disease activity index<sup>1)</sup>

| Score | Weight loss (%) <sup>2)</sup> | Stool consistency <sup>3)</sup> | Occult blood or gross blood |
|-------|-------------------------------|---------------------------------|-----------------------------|
| 0     | none                          | normal                          | negative                    |
| 1     | 1-5                           |                                 | negative                    |
| 2     | 6-10                          | loose                           | hemoccult positive          |
| 3     | 11-15                         |                                 | visible blood stool         |
| 4     | >15                           | diarrhea                        | gross bleeding              |

1) Disease activity index = (combined score of weight loss, stool consistency, and bleeding)/3.

2) Body weight loss was calculated as the percent difference between the body weight before receiving DSD and the body weight on any particular day

3) Normal stools = intact pellets; loose stools = pasty stool that does not stick to the anus; and diarrhea = liquid stools that sticks to the anus.

**Supplement table3.** Content of GABA,  $\gamma$ -oryzanol,  $\gamma$ -tocotrienol and phenolic acids in cooked WR, BR and R-BR ( $\mu\text{g}$  per g dry weight) (mean  $\pm$  SD; n=5)

| Bioactive compounds     | WR                           | BR                          | R-BR                        |
|-------------------------|------------------------------|-----------------------------|-----------------------------|
| GABA                    | 12.0 $\pm$ 0.9 <sup>a</sup>  | 108 $\pm$ 5.1 <sup>b</sup>  | 111 $\pm$ 8.6 <sup>b</sup>  |
| Gamma-oryzanol          | 4.4 $\pm$ 0.4 <sup>a</sup>   | 241 $\pm$ 11.4 <sup>b</sup> | 252 $\pm$ 8.2 <sup>b</sup>  |
| Gamma-tocotrienol       | 0.2 $\pm$ 0.02 <sup>a</sup>  | 34.8 $\pm$ 3.0 <sup>b</sup> | 38.9 $\pm$ 1.7 <sup>b</sup> |
| Ferulic acid            | 38.4 $\pm$ 2.1 <sup>a</sup>  | 417 $\pm$ 16.1 <sup>b</sup> | 424 $\pm$ 16.6 <sup>b</sup> |
| <i>p</i> -coumaric acid | 0.81 $\pm$ 0.07 <sup>a</sup> | 102 $\pm$ 5.3 <sup>b</sup>  | 107 $\pm$ 8.3 <sup>b</sup>  |

Means with different letters on the same row indicate significant differences ( $p < 0.05$ )
